# Supplementary material for: Development of graphitic-N-based carbon dots using solid-state synthesis for fingerprinting, LEDs, and anticounterfeiting
Source: Royal Society of Chemistry journal article supplement (doi:10.1039/d3nj03060a), 2023-01-01
Supplement: d3nj03060a1.pdf [file d3nj03060a1.pdf]

## Supplementary Information

### **Development of Graphitic-N-based Carbon Dots Using Solid-state Synthesis for Fingerprinting, LEDs, and Anticounterfeiting.**

Ashok Kumar<sup>a</sup>, Rinki Kumari<sup>a,b</sup>, Kanchan Negi<sup>a</sup>, and Sumanta Kumar Sahu<sup>a\*</sup>

<sup>a</sup>Department of Chemistry and Chemical Biology, Indian Institute of Technology (ISM), Dhanbad 826004, Jharkhand, India.

<sup>b</sup>Department of Chemistry, Bharat Institute of Engineering and Technology, Ibrahimpatnam, Hyderabad-501510, Telangana State, India

\*Corresponding author. E-mail: [sumantchem@gmail.com](mailto:sumantchem@gmail.com), [sksahu@iitism.ac.in](mailto:sksahu@iitism.ac.in);

Fax: +91 326-2307772; Tel: +91 3262235936, +91 7631042241

---

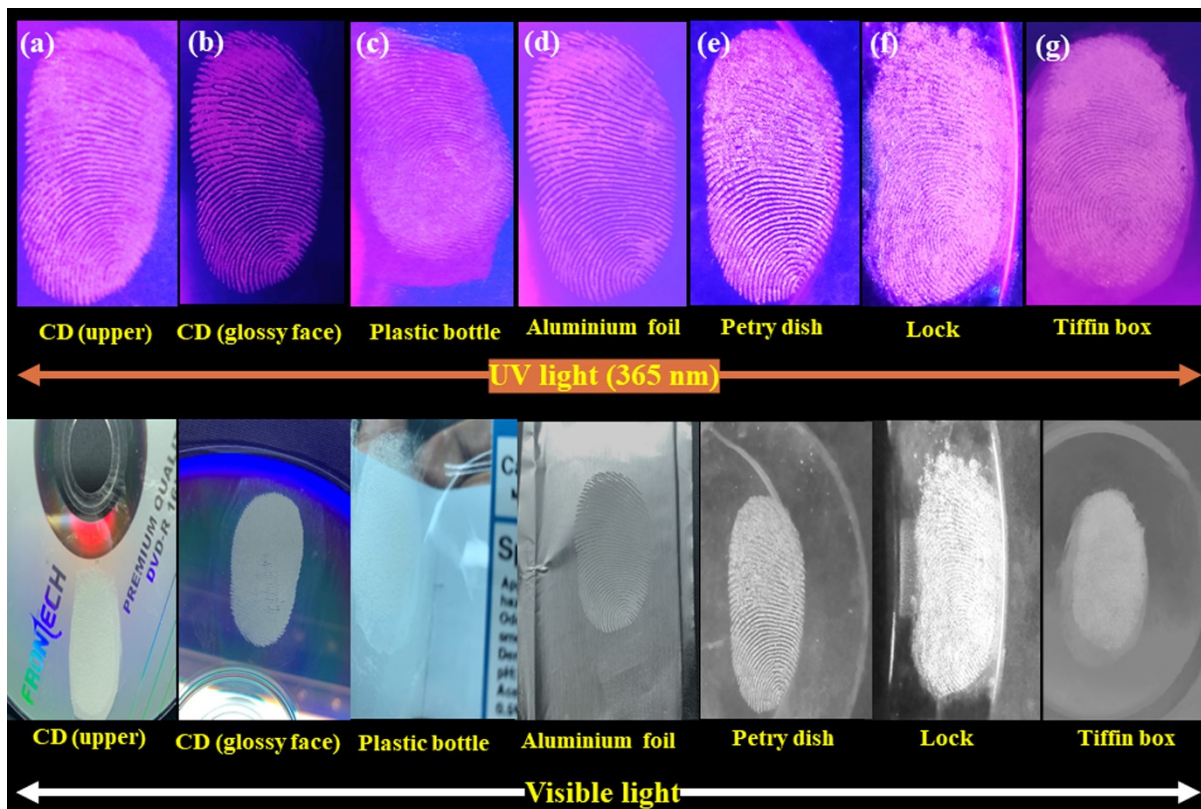

**Fig. S1** The latent fingerprints (LFPs) developed on different substrates like on (a) compact disc upper face (b) compact disc glossy face (c) plastic solvent bottle (d) foil made of aluminium (e) petri dish made of glass (f) lock, and (g) tiffin box in daylight (visible light) as well as UV irradiation (365 nm).

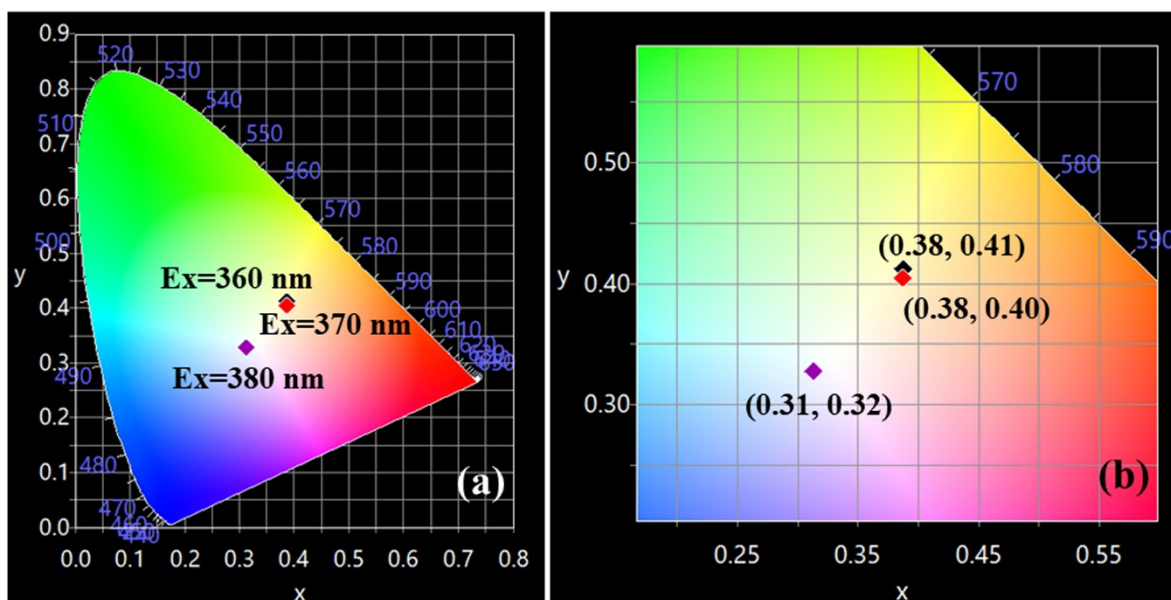

**Fig. S2** (a) CIE Coordinates of RP-CDs at different excitation wavelengths and (b) CIE Enlarged image of RP-CDs

**Table S1.** LED parameters of RP-CDs-based LED at different currents.

| <b>Excitation</b> | <b>CIE</b>     | <b>CRI</b> | <b>CCT</b> |
|-------------------|----------------|------------|------------|
| <b>360 nm</b>     | 0.3875, 0.4126 | 59         | 4061       |
| <b>370 nm</b>     | 0.3874, 0.4046 | 61         | 4014       |
| <b>380 nm</b>     | 0.3133, 0.3276 | 81         | 6481       |

**Table S2.** LED parameters of RP-CDs at different excitations

| <b>CIE</b>            | <b>CRI</b> | <b>CCT</b>  | <b>Current</b> |
|-----------------------|------------|-------------|----------------|
| <b>0.4675, 0.4114</b> | <b>91</b>  | <b>2603</b> | <b>700 mA</b>  |
| <b>0.4137, 0.3898</b> | <b>96</b>  | <b>3313</b> | <b>600 mA</b>  |
| <b>0.4140, 0.3862</b> | <b>97</b>  | <b>3277</b> | <b>500 mA</b>  |
| <b>0.4056, 0.3778</b> | <b>98</b>  | <b>3383</b> | <b>400 mA</b>  |

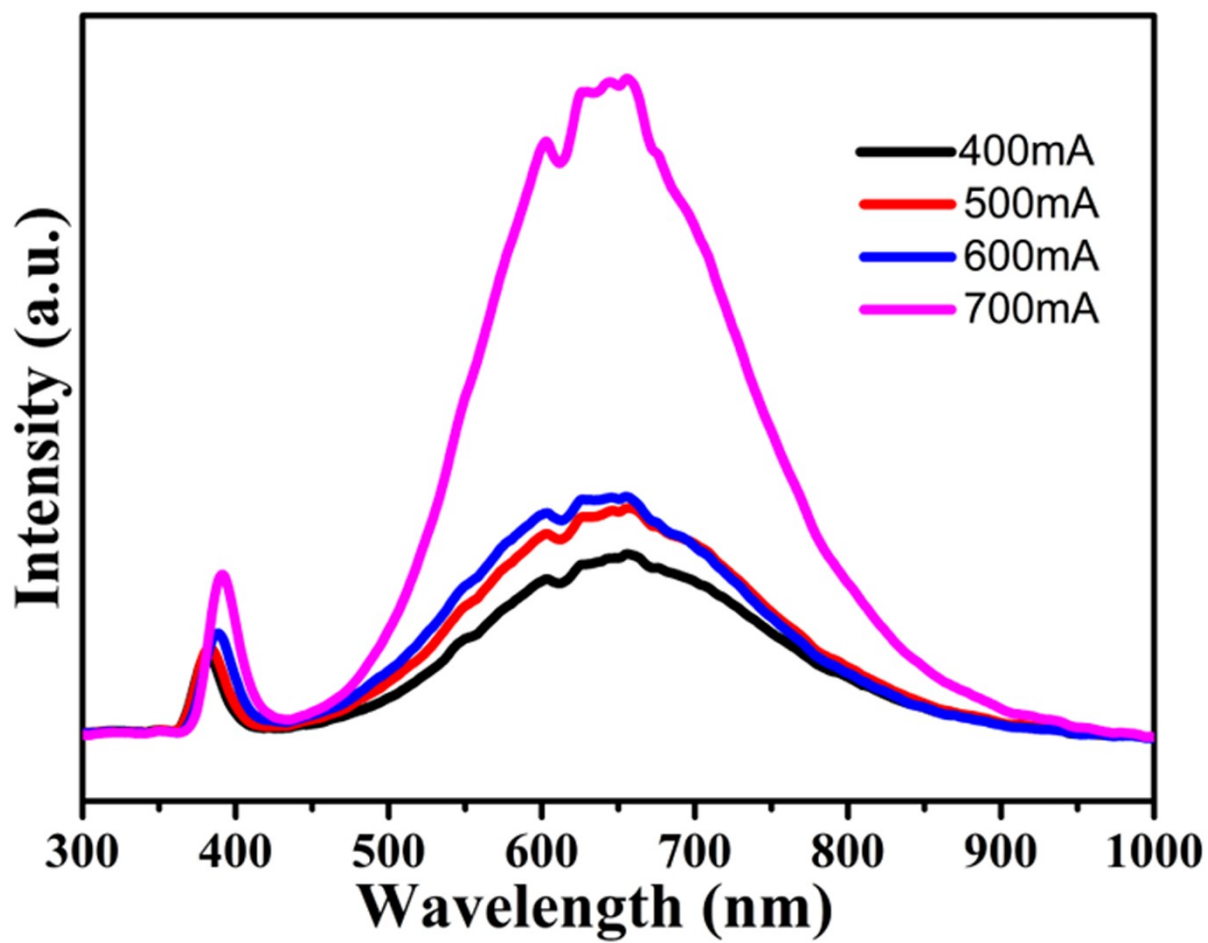

Fig. S3 PL Emission spectrum of RP-CDs-based LED at different currents.

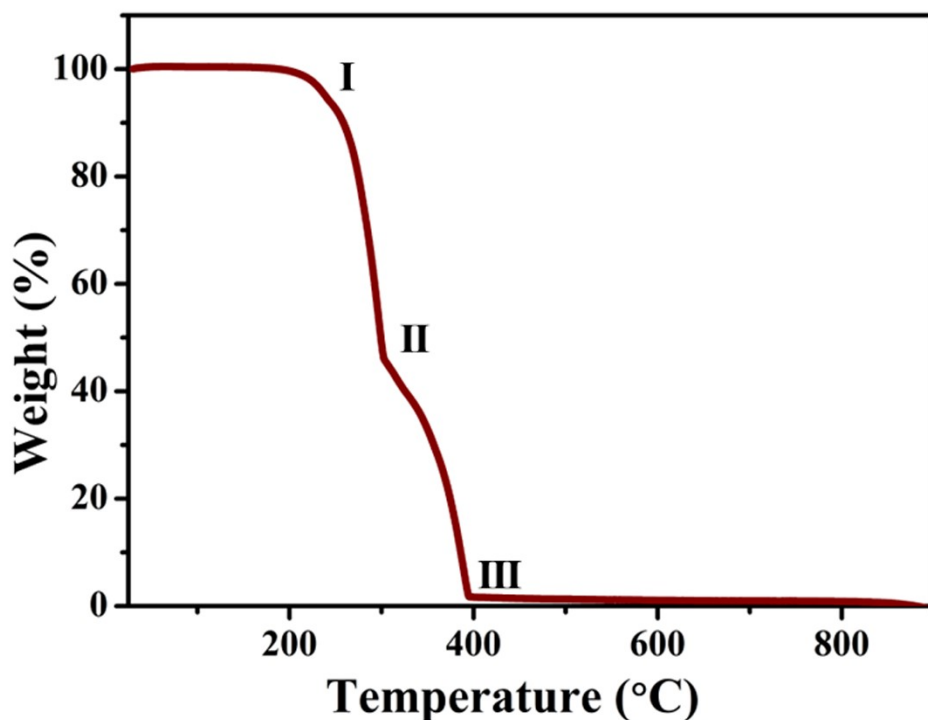

**Fig. S4** Thermal gravimetric analysis of RP-CDs.

TGA analysis was performed to analyze the thermal stability of the carbon dots. RP-CDs were completely dried in a vacuum oven at 100 °C for 72 h before doing thermal gravimetric analysis. The TGA curve of RP-CDs is shown in Fig. S4, and the temperature of 230 °C (about 55% weight loss) that happens may be related to the degradation of the carbonyl group (C=O) present in the carbon dots. The imine group (C=N) was responsible for the second weight loss at 306 °C (approx. 45%) and the third curve depicts the total degradation of CDs at 395 °C.

**Table S3.** The comparative table between previously reported carbon dots with the type of surfaces (where latent fingerprints were taken), fluorescence emission, precursor, and synthesis methods.

| Precursors                              | Synthesis methods     | Fluorescence    | Type of surface (where LFPs detected)                                                                                                                    | References  |
|-----------------------------------------|-----------------------|-----------------|----------------------------------------------------------------------------------------------------------------------------------------------------------|-------------|
| Luminol & coconut water                 | Hydrothermal method   | Blue            | Glass, coins, plastics,                                                                                                                                  | [1]         |
| Resorcinol and phloroglucin             | Microwave synthesis   | Blue and Orange | Foam                                                                                                                                                     | [2]         |
| p-phenylenediamine and phosphorus acid. | Hydrothermal method   | Red             | Glass sheets, aluminum foil, leather, and plastic pieces                                                                                                 | [3]         |
| Phloroglucinol and boric acid           | Solid state reaction  | Red             | Metal foil, Plastic sheet                                                                                                                                | [4]         |
| Phthalic acid and piperazine            | Microwave synthesis   | Yellow-green    | Glass, tinfoil, plastics and weighing paper                                                                                                              | [5]         |
| Tartaric acid and triethylene tetramine | Hydrothermal process  | Green           | Glass slides, tiles, leather, aluminum foil, printing paper, colored surfaces of plastic packing, copper foil, planks, leaves, currencies, and bar codes | [6]         |
| Sodium citrate and urea                 | Solvothermal method.  | Blue            | Silicon pieces                                                                                                                                           | [7]         |
| Pyromellitic acid and urea              | Solid-state synthesis | Red             | Compact disc upper face, compact disc glossy face, plastic solvent bottle, aluminium foil, petri dish (glass), lock (steel), and the tiffin box.         | [This work] |

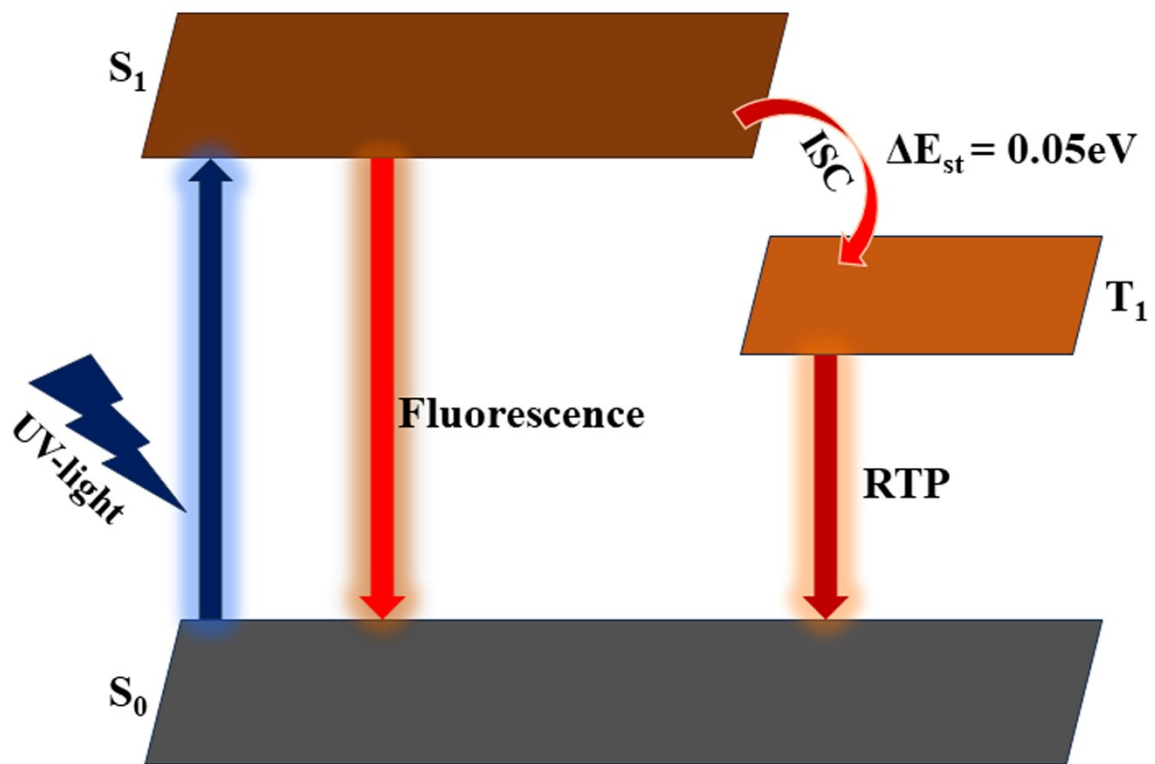

Fig. S5 The energy level diagram of RP-CDs.



**References: -**

1. D. Nugroho, C. Keawprom, S. Chanthai, W.-C. Oh and R. Benchawattananon, *Nanomaterials (Basel)*, 2022, **12**, 400.
2. Z. Deng, C. Liu, Y. Jin, J. Pu, B. Wang and J. Chen, *Analyst*, 2019, **144**, 4569-4574.
3. J. Chen, J.-S. Wei, P. Zhang, X.-Q. Niu, W. Zhao, Z.-Y. Zhu, H. Ding and H.-M. Xiong, *ACS Appl. Mater. Interfaces*, 2017, **9**, 18429-18433.
4. X. Niu, T. Song and H. Xiong, *Chin. Chem. Lett.*, 2021, **32**, 1953-1956.
5. H.-J. Wang, W.-Y. Hou, T.-T. Yu, H.-L. Chen and Q.-Q. Zhang, *Dyes Pigm.*, 2019, **170**, 107623.
6. D.-W. Li, X.-F. Zhang, X.-T. Zhang, X.-S. Lv and N. You, *Anal. Methods*, 2023, **15**, 1297-1305.
7. G. Ren, Y. Meng, Q. Zhang, M. Tang, B. Zhu, F. Chai, C. Wang and Z. Su, *New J Chem*, 2018, **42**, 6824-6830.
